# Supplementary material for: Dietary Interventions in Ulcerative Colitis: A Systematic Review of the Evidence with Meta-Analysis
Source: MDPI journal article supplement (doi:10.3390/nu15194194), 2023-09-28
Supplement: s1 [file s1]

|                         | Random sequence generation (selection bias) | Allocation concealment (selection bias) | Blinding of participants and personnel (performance bias) | Blinding of outcome assessment (detection bias) | Incomplete outcome data (attrition bias) | Selective reporting (reporting bias) | Other bias |
|-------------------------|---------------------------------------------|-----------------------------------------|-----------------------------------------------------------|-------------------------------------------------|------------------------------------------|--------------------------------------|------------|
| Bhattacharyya (2017)    | ⊖                                           | ⊖                                       | ⊕                                                         | ?                                               | ?                                        | ⊖                                    | ⊕          |
| Bodini (2019)           | ⊕                                           | ⊕                                       | ⊖                                                         | ⊖                                               | ⊕                                        | ⊕                                    | ?          |
| Candy (1995)            | ?                                           | ?                                       | ⊖                                                         | ⊕                                               | ⊕                                        | ⊕                                    | ⊕          |
| Fritsch (2021)          | ⊕                                           | ⊖                                       | ⊖                                                         | ?                                               | ⊖                                        | ⊕                                    | ⊕          |
| González-Huix (1993)    | ?                                           | ⊖                                       | ⊖                                                         | ⊕                                               | ⊕                                        | ⊕                                    | ?          |
| Ishikawa (2003)         | ⊕                                           | ⊕                                       | ⊖                                                         | ⊖                                               | ⊕                                        | ⊕                                    | ?          |
| Kato (2004)             | ⊕                                           | ⊕                                       | ⊖                                                         | ⊖                                               | ⊕                                        | ⊕                                    | ?          |
| Keshteli (2022)         | ?                                           | ?                                       | ⊕                                                         | ?                                               | ⊕                                        | ⊕                                    | ?          |
| Kyaw (2014)             | ⊕                                           | ⊕                                       | ⊖                                                         | ⊖                                               | ⊕                                        | ⊕                                    | ?          |
| Miyaguchi (2023)        | ⊕                                           | ⊕                                       | ⊖                                                         | ⊖                                               | ⊕                                        | ⊕                                    | ?          |
| Sarbagili-Shabat (2022) | ⊕                                           | ⊕                                       | ⊖                                                         | ⊖                                               | ⊕                                        | ⊕                                    | ?          |
| Strisciuglio (2013)     | ⊕                                           | ?                                       | ⊖                                                         | ⊕                                               | ⊕                                        | ⊕                                    | ⊕          |
| Wright (1965)           | ?                                           | ?                                       | ⊖                                                         | ?                                               | ⊖                                        | ⊖                                    | ?          |
| Wright (1966)           | ?                                           | ?                                       | ⊖                                                         | ?                                               | ⊖                                        | ⊖                                    | ?          |

**Figure S1.** Risk of bias summary

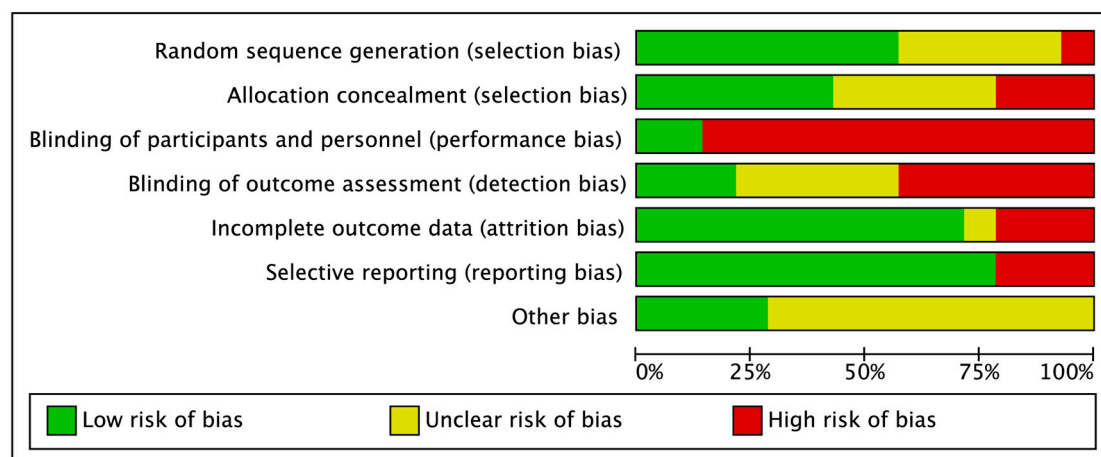

Figure S2. Risk of bias graph

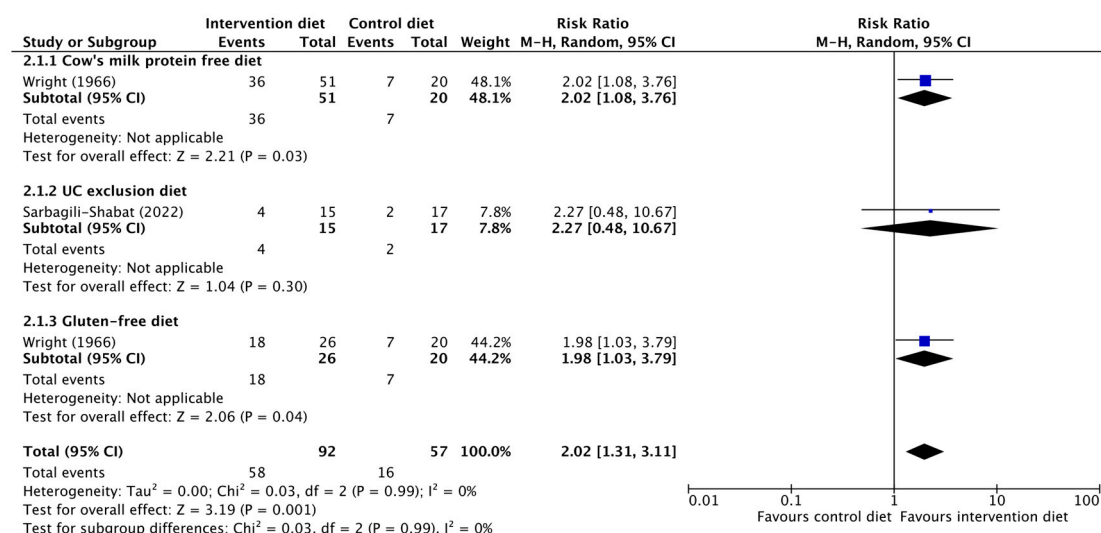

Figure S3. Induction of endoscopic remission in ulcerative colitis

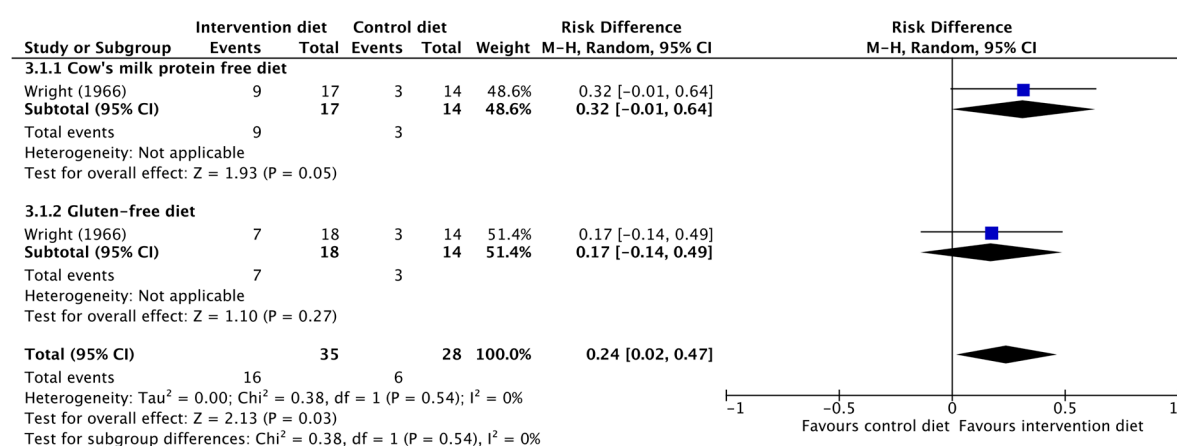

Figure S4. Induction of histologic remission in ulcerative colitis

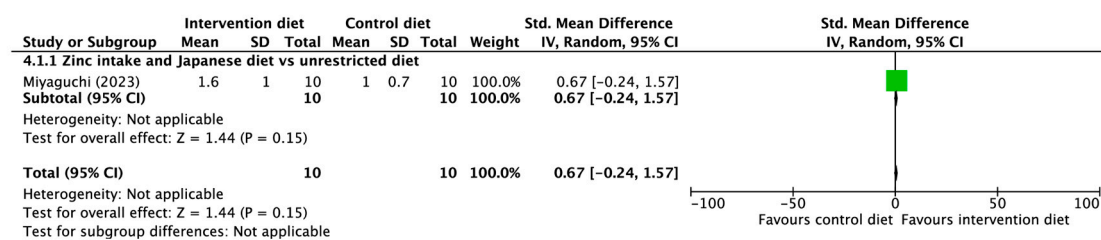

**Figure S5.** Histologic improvement in ulcerative colitis

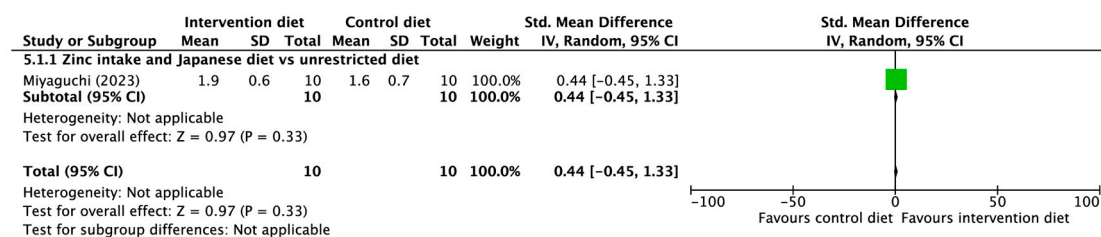

**Figure S6.** Endoscopic improvement in ulcerative colitis.
